# Supplementary material for: SIRT1 Serum Concentrations in Lipodystrophic Syndromes
Source: MDPI journal article supplement (doi:10.3390/ijms25094785), 2024-04-27
Supplement: s1 [file s1]

| Table S1. Correlation between SIRT1 and metabolic variables in LDs patients. |        |         |
|------------------------------------------------------------------------------|--------|---------|
|                                                                              | SIRT1  |         |
|                                                                              | r      | p-value |
| BMI (Kg/m <sup>2</sup> )                                                     | 0.096  | 0.605   |
| Total Fat (%)                                                                | -0.152 | 0.431   |
| FPG (mg/dL)                                                                  | -0.020 | 0.266   |
| Tot-Cholesterol (mg/dL)                                                      | 0.064  | 0.73    |
| LDL-Cholesterol (mg/dL)                                                      | 0.185  | 0.319   |
| Triglycerides (mg/dL)                                                        | 0.178  | 0.337   |

SIRT1 and metabolic indicators correlation in patients with lipodystrophy. SIRT1 was not correlated with any of the variables (p-value > 0.05). BMI, body mass index; FPG, fasting plasma glucose; LDL, low-density lipoprotein-cholesterol.
